# Supplementary material
Source: Springer Nature journal article supplement (https://www.springermedizin.de/resource/supplementary/12875_2012_755_MOESM1_ESM.pdf/9435334)
Supplement: MOESM1 [file 9435334]

**13. Echangez-vous en face à face ou au téléphone autour de cas concrets de patients avec ...**

|                                    | <i>Très souvent</i>      | <i>Souvent</i>           | <i>De temps en temps</i> | <i>Rarement</i>          |
|------------------------------------|--------------------------|--------------------------|--------------------------|--------------------------|
| A - un / des médecins généralistes | <input type="checkbox"/> | <input type="checkbox"/> | <input type="checkbox"/> | <input type="checkbox"/> |
| B - un / des médecins spécialistes | <input type="checkbox"/> | <input type="checkbox"/> | <input type="checkbox"/> | <input type="checkbox"/> |
| C - un / des infirmiers            | <input type="checkbox"/> | <input type="checkbox"/> | <input type="checkbox"/> | <input type="checkbox"/> |
| D - un / des pharmaciens           | <input type="checkbox"/> | <input type="checkbox"/> | <input type="checkbox"/> | <input type="checkbox"/> |
| E - autre, qui ? : .....           | <input type="checkbox"/> | <input type="checkbox"/> | <input type="checkbox"/> | <input type="checkbox"/> |

**14. Quel(s) professionnel(s) avez-vous le plus de difficultés à solliciter pour vos patients du fait de**
*(plusieurs réponses possibles)*

|                                                                            | <i>Un spécialiste en ville</i> | <i>Un spécialiste à l'hôpital</i> | <i>Un infirmier / paramédical</i> | <i>Un pharmacien</i>     |
|----------------------------------------------------------------------------|--------------------------------|-----------------------------------|-----------------------------------|--------------------------|
| a - ... de l'éloignement                                                   | <input type="checkbox"/>       | <input type="checkbox"/>          | <input type="checkbox"/>          | <input type="checkbox"/> |
| b - ... du délai de RDV                                                    | <input type="checkbox"/>       | <input type="checkbox"/>          | <input type="checkbox"/>          | <input type="checkbox"/> |
| c - ... du dépassement d'honoraires                                        | <input type="checkbox"/>       | <input type="checkbox"/>          | <input type="checkbox"/>          | <input type="checkbox"/> |
| d - ... de sa méconnaissance<br><i>(identité, compétence, coordonnées)</i> | <input type="checkbox"/>       | <input type="checkbox"/>          | <input type="checkbox"/>          | <input type="checkbox"/> |

**B - Contenu de votre activité et caractéristique de votre patientèle**
**☛ Votre activité**
**1 - Avez-vous un Mode d'Exercice Particulier ?**
 Oui  Non

**2 - Si oui lequel ?** .....

**3 - Avez-vous une activité spécialisée ?** *(gynéco, pédiatrie, sport, gériatrie, etc.)*
 Oui  Non

**4 - Si oui laquelle ?** .....

**5 - Quelle part de votre temps de travail consacrez-vous à cette ou ces activités ?** .....%

**6 - Exercez-vous des activités d'enseignement ?** *(université ou autre)*
 Oui  Non

**7 - Êtes-vous maître de stage ?**
 Oui  Non

**15. Quelles sont les indemnités ou rémunérations annuelles de vos différentes activités en 2008 ?**
*(Relevé SNIR 2008)*

- A- Permanence des soins / gardes NBR [MAJF, MAJN, MAJU] .....
- Indemnités permanence téléphonique MNT [FRG] ..... €
- B- Forfaits de coordination MNT [FC 0-9] ..... €
- C- Aide pérenne à la transmission MNT [FFS] ..... €
- D- Indemnités de déplacement NBR [ID + IF + IK] .....
- Dont frais de déplacement non remboursables MNT [FNR] ..... €
- E- Formations diverses MNT [FF 0-9] + autres sources ..... €
- F- Indemnités Maître de stage ..... €
- G- Aides à l'installation *(régionale, Cnamts)* ..... €
- H- Indemnités *(élu professionnel, autre activité professionnelle)* ..... €
- G- Autres ? ..... €

| 8 - Réalisez-vous ? ( <i>plusieurs réponses possibles</i> ) | Très souvent             | Souvent                  | De temps en temps        | Rarement                 |
|-------------------------------------------------------------|--------------------------|--------------------------|--------------------------|--------------------------|
| a – Un suivi gynécologique                                  | <input type="checkbox"/> | <input type="checkbox"/> | <input type="checkbox"/> | <input type="checkbox"/> |
| b - De la petite chirurgie (plâtre, points de suture, etc.) | <input type="checkbox"/> | <input type="checkbox"/> | <input type="checkbox"/> | <input type="checkbox"/> |
| c - De la petite traumatologie                              | <input type="checkbox"/> | <input type="checkbox"/> | <input type="checkbox"/> | <input type="checkbox"/> |
| d - Un test à l'effort                                      | <input type="checkbox"/> | <input type="checkbox"/> | <input type="checkbox"/> | <input type="checkbox"/> |
| e - Un électrocardiogramme                                  | <input type="checkbox"/> | <input type="checkbox"/> | <input type="checkbox"/> | <input type="checkbox"/> |
| e - De la prévention du tabac                               | <input type="checkbox"/> | <input type="checkbox"/> | <input type="checkbox"/> | <input type="checkbox"/> |
| f - De la prévention de l'alcool                            | <input type="checkbox"/> | <input type="checkbox"/> | <input type="checkbox"/> | <input type="checkbox"/> |
| g - De la prévention contre l'obésité                       | <input type="checkbox"/> | <input type="checkbox"/> | <input type="checkbox"/> | <input type="checkbox"/> |
| h - Un suivi de grossesse                                   | <input type="checkbox"/> | <input type="checkbox"/> | <input type="checkbox"/> | <input type="checkbox"/> |
| i – une prise en charge de toxicomane                       | <input type="checkbox"/> | <input type="checkbox"/> | <input type="checkbox"/> | <input type="checkbox"/> |
| j – Un suivi pédiatrique                                    | <input type="checkbox"/> | <input type="checkbox"/> | <input type="checkbox"/> | <input type="checkbox"/> |

9 - Participez-vous à un réseau médical de prise en charge?  Oui  Non

10 - Si oui, le ou lesquels ? : .....

11 - Combien de demi-journées travaillez-vous *en moyenne* par semaine ? .. .. demi-journées

12 - Combien d'heures travaillez-vous *en moyenne* par semaine ? .. .. heures

13 - Combien de semaines de vacances prenez-vous *en moyenne* par an ? .. .. semaines

14 - Combien de consultations avez-vous réalisé en 2008 ?  
(RIAP 2008) .. .. .

15 - Combien de visites avez-vous réalisé en 2008 ?  
(RIAP 2008) .. .. .

16 - Quel est le montant remboursable des actes que vous avez réalisés en 2008 ?  
(RIAP 2008) .. .. . €

### Votre patientèle

(RIAP 2008)

17 - Nombre de patients dont vous êtes le « médecin traitant » .. .. .

18 - % de patients exonérés du TM .. .. %

19 - % de bénéficiaires de la CMU .. .. %

20 - % des actifs ayant eu des IJ .. .. %

21 - % de patients de moins de 16 ans .. .. %

22 - % de patients de 16 à 59 ans .. .. %

23 - % de patients de 60 à 69 ans .. .. %

24 - % de patients de 70 ans et plus .. .. %

### C – Votre satisfaction et vos contraintes professionnelles

|                                                                                                | <i>Souvent</i>           | <i>De temps en temps</i> | <i>Rarement</i>              | <i>Jamais</i>                |
|------------------------------------------------------------------------------------------------|--------------------------|--------------------------|------------------------------|------------------------------|
| <b>1 - Êtes-vous satisfait de votre activité professionnelle ?</b>                             | <input type="checkbox"/> | <input type="checkbox"/> | <input type="checkbox"/>     | <input type="checkbox"/>     |
| <b>2 - Vous sentez-vous libre de modifier votre agenda ?</b>                                   | <input type="checkbox"/> | <input type="checkbox"/> | <input type="checkbox"/>     | <input type="checkbox"/>     |
| <b>3 - Vous sentez-vous contraint par les exigences de vos patients sur...</b>                 |                          |                          |                              |                              |
| A- les horaires d'ouverture du cabinet                                                         | <input type="checkbox"/> | <input type="checkbox"/> | <input type="checkbox"/>     | <input type="checkbox"/>     |
| B- la durée de vos consultations                                                               | <input type="checkbox"/> | <input type="checkbox"/> | <input type="checkbox"/>     | <input type="checkbox"/>     |
| C - vos prescriptions médicamenteuses                                                          | <input type="checkbox"/> | <input type="checkbox"/> | <input type="checkbox"/>     | <input type="checkbox"/>     |
| D - vos prescriptions d'analyses et tests                                                      | <input type="checkbox"/> | <input type="checkbox"/> | <input type="checkbox"/>     | <input type="checkbox"/>     |
| E - vos prescriptions d'arrêts de travail                                                      | <input type="checkbox"/> | <input type="checkbox"/> | <input type="checkbox"/>     | <input type="checkbox"/>     |
| F - les orientations vers les spécialistes dans le cadre du parcours de soins                  | <input type="checkbox"/> | <input type="checkbox"/> | <input type="checkbox"/>     | <input type="checkbox"/>     |
| <b>4 - Considérez-vous que votre profession est gratifiante sur le plan humain</b>             | <input type="checkbox"/> | <input type="checkbox"/> | <input type="checkbox"/>     | <input type="checkbox"/>     |
| <b>5 - Avez-vous un sentiment de <i>burn out</i> ?</b>                                         | <input type="checkbox"/> | <input type="checkbox"/> | <input type="checkbox"/>     | <input type="checkbox"/>     |
| <b>6 - Êtes-vous confronté à des patients de plus en plus informés ?</b>                       |                          |                          | <input type="checkbox"/> Oui | <input type="checkbox"/> Non |
| <b>7 - Si oui, considérez-vous que c'est une contrainte ?</b>                                  | <input type="checkbox"/> | <input type="checkbox"/> | <input type="checkbox"/>     | <input type="checkbox"/>     |
| <b>8 - Avez-vous envie de changer ...</b>                                                      |                          |                          |                              |                              |
| A - de spécialité                                                                              | <input type="checkbox"/> | <input type="checkbox"/> | <input type="checkbox"/>     | <input type="checkbox"/>     |
| B - de lieu d'installation                                                                     | <input type="checkbox"/> | <input type="checkbox"/> | <input type="checkbox"/>     | <input type="checkbox"/>     |
| C - de statut ( <i>libéral / salarié</i> )                                                     | <input type="checkbox"/> | <input type="checkbox"/> | <input type="checkbox"/>     | <input type="checkbox"/>     |
| D - de mode d'installation ( <i>individuel ⇌ groupe</i> )                                      | <input type="checkbox"/> | <input type="checkbox"/> | <input type="checkbox"/>     | <input type="checkbox"/>     |
| <b>9 - Êtes-vous satisfait de la rémunération de votre activité médicale libérale ?</b>        |                          |                          | <input type="checkbox"/> Oui | <input type="checkbox"/> Non |
| <b>10 - Que représentent vos salaires éventuels (bruts) par rapport à vos revenus totaux ?</b> |                          |                          |                              | ... %                        |
| <b>11 - Vous sentez-vous contraints par le contrôle de l'assurance maladie ?</b>               |                          |                          | <input type="checkbox"/> Oui | <input type="checkbox"/> Non |
| <b>12 - Si oui, est-ce que cela modifie votre pratique ?</b>                                   |                          |                          | <input type="checkbox"/> Oui | <input type="checkbox"/> Non |
| <b>13 - Rencontrez-vous des difficultés particulières dues au profil de votre patientèle ?</b> |                          |                          | <input type="checkbox"/> Oui | <input type="checkbox"/> Non |
| <b>14 - Si oui, la ou lesquelles ?</b> .....                                                   |                          |                          |                              |                              |
| .....                                                                                          |                          |                          |                              |                              |
| .....                                                                                          |                          |                          |                              |                              |
| <b>15 - Avez-vous déjà ressenti un sentiment d'insécurité dans votre exercice</b>              |                          |                          | <input type="checkbox"/> Oui | <input type="checkbox"/> Non |

## D – Quelques questions supplémentaires

1. Sexe :  Homme  Femme
- 
2. Age : ... ans
- 
3. Année d'installation : .....
- 
4. Avez-vous changé de mode d'installation dans les 5 dernières années (*individuel*  $\neq$  *groupe*)  Oui  Non
- 
5. Département ...
- 
6. Dans une commune de ... habitants  Moins de 10 000  De 10 à 20 000  De 20 à 100 000  Plus de 100 000
- 
7. Exercez-vous en Zone Franche Urbaine (ZFU)  Oui  Non
- 
8. Exercez-vous en Zone de Revitalisation Rurale (ZRR)  Oui  Non
- 
9. Avez-vous un ou des enfants à charge de moins de 15 ans  Oui  Non
10. Si oui quel âge a le plus jeune ... ans
- 
11. Comment percevez-vous votre santé ?  Excellente  Très bonne  Bonne  Médiocre
- 
12. Êtes-vous abonné à une revue professionnelle ?  Oui  Non
- 
13. Suivez-vous des cycles de formation médicale continue  Oui  Non
- 
14. Avez-vous déjà participé à une action d'Evaluation des Pratiques Professionnelles  Oui  Non
- 

**MERCI POUR VOTRE PARTICIPATION**
